# Supplementary material
Source: ML conference proceedings conference paper supplement (https://proceedings.mlr.press/v80/chen18d.html)
Supplement: Supplementary file 1 [file chen18d-supp.pdf]

## A. Assumptions of Theorem 2

First, let us define the infinitesimal generator of the diffusion (2). Formally, the *generator*  $\mathcal{L}$  of the diffusion (2) is defined for any compactly supported twice differentiable function  $f : \mathbb{R}^L \rightarrow \mathbb{R}$ , such that,

$$\begin{aligned} \mathcal{L}f(\mathbf{Z}_t) &\triangleq \lim_{h \rightarrow 0^+} \frac{\mathbb{E}[f(\mathbf{Z}_{t+h})] - f(\mathbf{Z}_t)}{h} \\ &= \left( F(\mathbf{Z}_t) \cdot \nabla + \frac{1}{2} (G(\mathbf{Z}_t)G(\mathbf{Z}_t)^T) : \nabla \nabla^T \right) f(\mathbf{Z}_t), \end{aligned}$$

where  $\mathbf{a} \cdot \mathbf{b} \triangleq \mathbf{a}^T \mathbf{b}$ ,  $\mathbf{A} : \mathbf{B} \triangleq \text{tr}(\mathbf{A}^T \mathbf{B})$ ,  $h \rightarrow 0^+$  means  $h$  approaches zero along the positive real axis.

Given an ergodic diffusion (2) with an invariant measure  $\rho(\mathbf{Z})$ , the posterior average is defined as:  $\bar{\psi} \triangleq \int \psi(\mathbf{Z})\rho(\mathbf{Z})d\mathbf{Z}$  for some test function  $\psi(\mathbf{Z})$  of interest. For a given numerical method with generated samples  $(\mathbf{z}_k)_{k=1}^K$ , we use the *sample average*  $\hat{\psi}$  defined as  $\hat{\psi}_K = \frac{1}{K} \sum_{k=1}^K \psi(\mathbf{z}_k)$  to approximate  $\bar{\psi}$ . We define a functional  $\tilde{\psi}$  that solves the following *Poisson Equation*:

$$\mathcal{L}\tilde{\psi}(\mathbf{z}_k) = \psi(\mathbf{z}_k) - \bar{\psi} \quad (12)$$

We make the following assumptions on  $\tilde{\psi}$ .

**Assumption 1**  $\tilde{\psi}$  exists, and its up to 4rd-order derivatives,  $\mathcal{D}^k \tilde{\psi}$ , are bounded by a function  $\mathcal{V}$ , i.e.,  $\|\mathcal{D}^k \tilde{\psi}\| \leq C_k \mathcal{V}^{p_k}$  for  $k = (0, 1, 2, 3, 4)$ ,  $C_k, p_k > 0$ . Furthermore, the expectation of  $\mathcal{V}$  on  $\{\mathbf{z}_k\}$  is bounded:  $\sup_l \mathbb{E} \mathcal{V}^{p_l}(\mathbf{z}_k) < \infty$ , and  $\mathcal{V}$  is smooth such that  $\sup_{s \in (0,1)} \mathcal{V}^p(s\mathbf{z} + (1-s)\mathbf{y}) \leq C(\mathcal{V}^p(\mathbf{z}) + \mathcal{V}^p(\mathbf{y}))$ ,  $\forall \mathbf{z}, \mathbf{y}, p \leq \max\{2p_k\}$  for some  $C > 0$ .

## B. Proofs for Section 3

**Proof** [Sketch Proof of Lemma 1] First note that (5) in Lemma 1 corresponds to eq.13 in (Jordan et al., 1998), where  $F(p)$  in (Jordan et al., 1998) is in the form of  $\text{KL}(\rho \| p_\theta(\mathbf{x}, \mathbf{z}))$  in our setting.

Proposition 4.1 in (Jordan et al., 1998) then proves that (5) has a unique solution. Theorem 5.1 in (Jordan et al., 1998) then guarantees that the solution of (5) approach the solution of the Fokker-Planck equation in (3), which is  $\rho_T$  in the limit of  $h \rightarrow 0$ .

Since this is true for each  $k$  (thus each  $t$  in  $\rho_t$ ), we conclude that  $\hat{\rho}_k = \rho_{hk}$  in the limit of  $h \rightarrow 0$ . ■

To prove Theorem 2, we first need a convergence result about convergence to equilibrium in Wasserstein distance

for Fokker-Planck equations, which is presented in (Bolley et al., 2012). Putting in our setting, we can get the following lemma based on Corollary 2.4 in (Bolley et al., 2012).

**Lemma 6 ((Bolley et al., 2012))** Let  $\rho_T$  be the solution of the FP equation (3) at time  $T$ ,  $p_\theta(\mathbf{x}, \mathbf{z})$  be the joint posterior distribution given  $\mathbf{x}$ . Assume that  $\int \rho_T(\mathbf{z})p_\theta^{-1}(\mathbf{x}, \mathbf{z})d\mathbf{z} < \infty$  and there exists a constant  $C$  such that  $\frac{dW_2^2(\rho_T, p_\theta(\mathbf{x}, \mathbf{z}))}{dt} \geq CW_2^2(\rho_T, p_\theta(\mathbf{x}, \mathbf{z}))$ . Then

$$W_2(\rho_T, p(\mathbf{x}, \mathbf{z})) \leq W_2(\rho_0, p(\mathbf{x}, \mathbf{z})) e^{-CT}. \quad (13)$$

We further need to borrow convergence results from (Mattingly et al., 2010; Vollmer et al., 2016; Chen et al., 2015) to characterize error bounds of a numerical integrator for the diffusion (2). Specifically, the goal is to evaluate the posterior average of a test function  $\psi(\mathbf{z})$ , defined as  $\bar{\psi} \triangleq \int \psi(\mathbf{z})p_\theta(\mathbf{x}, \mathbf{z})d\mathbf{z}$ . When using a numerical integrator to solve (2) to get samples  $\{\mathbf{z}_k\}_{k=1}^K$ , the sample average  $\hat{\psi}_K \triangleq \frac{1}{K} \sum_{k=1}^K \psi(\mathbf{z}_k)$  is used to approximate the posterior average. The accuracy is characterized by the mean square error (MSE) defined as:  $\mathbb{E}(\hat{\psi}_K - \bar{\psi})^2$ . Lemma 7 derives the bound for the MSE.

**Lemma 7 ((Vollmer et al., 2016))** Under Assumption 1, and for a 1st-order numerical intergrator, the MSE is bounded, for a constant  $C$  independent of  $h$  and  $K$ , by

$$\mathbb{E}(\hat{\psi}_K - \bar{\psi})^2 \leq C \left( \frac{1}{hK} + h^2 \right).$$

Furthermore, except for the 2nd-order Wasserstein distance defined in Lemma 1, we define the 1st-order Wasserstein distance between two probability measures  $\mu_1$  and  $\mu_2$  as

$$W_1(\mu_1, \mu_2) \triangleq \inf_{p \in \mathcal{P}(\mu_1, \mu_2)} \int \|\mathbf{x} - \mathbf{y}\|_2 p(d\mathbf{x}, d\mathbf{y}). \quad (14)$$

According to the Kantorovich-Rubinstein duality (Arjovsky et al., 2017),  $W_1(\mu_1, \mu_2)$  is equivalently represented as

$$W_1(\mu_1, \mu_2) = \sup_{f \in \mathcal{L}_1} \mathbb{E}_{\mathbf{z} \sim \mu_1} [f(\mathbf{z})] - \mathbb{E}_{\mathbf{z} \sim \mu_2} [f(\mathbf{z})], \quad (15)$$

where  $\mathcal{L}_1$  is the space of 1-Lipschitz functions  $f : \mathbb{R}^L \rightarrow \mathbb{R}$ .

We have the following relation between  $W_1(\mu_1, \mu_2)$  and  $W_2(\mu_1, \mu_2)$ .

**Lemma 8 ((Givens & Shortt, 1984))** We have for any two distributions  $\mu_1$  and  $\mu_2$  that  $W_1(\mu_1, \mu_2) \leq W_2(\mu_1, \mu_2)$ .

Now it is ready to prove Theorem 2.

**Proof** [Proof of Theorem 2] The idea is to simply decompose the MSE into two parts, with one part charactering the

MSE of the numerical method, the other part characterizing the MSE of  $\rho_T$  and  $p_\theta(\mathbf{x}, \mathbf{z})$ , which consequentially can be bounded using Lemma 6 above.

Specifically, we have

$$\begin{aligned}
 \text{MSE}(\bar{\rho}_T, \rho_T; \psi) &\triangleq \mathbb{E} \left( \int \psi(\mathbf{z})(\bar{\rho}_T - \rho_T)(\mathbf{z}) d\mathbf{z} \right)^2 \\
 &= \mathbb{E} \left( \frac{1}{K} \sum_{k=1}^K \psi(\mathbf{z}_k) - \int \psi(\mathbf{z}) \rho_T(\mathbf{z}) d\mathbf{z} \right)^2 \\
 &= \mathbb{E} \left( \left( \frac{1}{K} \sum_{k=1}^K \psi(\mathbf{z}_k) - \int \psi(\mathbf{z}) p_\theta(\mathbf{x}, \mathbf{z}) d\mathbf{z} \right) \right. \\
 &\quad \left. - \left( \int \psi(\mathbf{z}) \rho_T(\mathbf{z}) d\mathbf{z} - \int \psi(\mathbf{z}) p_\theta(\mathbf{x}, \mathbf{z}) d\mathbf{z} \right) \right)^2 \\
 &\stackrel{(1)}{=} \mathbb{E} \left( \frac{1}{K} \sum_{k=1}^K \psi(\mathbf{z}_k) - \int \psi(\mathbf{z}) p_\theta(\mathbf{x}, \mathbf{z}) d\mathbf{z} \right)^2 \\
 &\quad + \left( \int \psi(\mathbf{z}) \rho_T(\mathbf{z}) d\mathbf{z} - \int \psi(\mathbf{z}) p_\theta(\mathbf{x}, \mathbf{z}) d\mathbf{z} \right)^2 \\
 &\stackrel{(2)}{\leq} \mathbb{E} \left( \frac{1}{K} \sum_{k=1}^K \psi(\mathbf{z}_k) - \int \psi(\mathbf{z}) p_\theta(\mathbf{x}, \mathbf{z}) d\mathbf{z} \right)^2 + W_1^2(\rho_T, p_\theta) \\
 &\stackrel{(3)}{\leq} \mathbb{E} \left( \frac{1}{K} \sum_{k=1}^K \psi(\mathbf{z}_k) - \int \psi(\mathbf{z}) p_\theta(\mathbf{x}, \mathbf{z}) d\mathbf{z} \right)^2 + W_2^2(\rho_T, p_\theta) \\
 &\stackrel{(4)}{\leq} C_1 \left( \frac{1}{hK} + h^2 \right) + W_2^2(\rho_0, p(\mathbf{x}, \mathbf{z})) e^{-2CT} \\
 &= O \left( \frac{1}{hK} + h^2 + e^{-2ChK} \right),
 \end{aligned}$$

where “(1)” follows by the fact that  $\mathbb{E} \left( \frac{1}{K} \sum_{k=1}^K \psi(\mathbf{z}_k) - \int \psi(\mathbf{z}) p_\theta(\mathbf{x}, \mathbf{z}) d\mathbf{z} \right) = 0$  (Chen et al., 2015); “(2)” follows by the definition of  $W_1(\mu_1, \mu_2)$  in (14) and the 1-Lipschitz assumption of the test function  $\psi$ ; “(3)” follows by Lemma 8; “(4)” follows by Lemma 6 and Lemma 7. ■

### C. Sample Distance $\mathcal{D}$ Implemented as a Discriminator in the GAN Framework

We first prove Proposition 4, and then describe our implementation for the Wasserstein distance  $\mathcal{D}$  in (8).

**Proof** [Proof of Proposition 4] By defining  $\mathcal{D}$  as standard Euclidean distance, the objective becomes:

$$\phi' = \arg \min_{\phi} \frac{1}{S} \sum_{i=1}^S \left\| \mathbf{z}_0^{(i)} - \mathbf{z}_1^{(i)} \right\|^2,$$

where  $\{\mathbf{z}_0^{(i)}\}_{i=1}^S$  are a set of samples generated from

$q_{\phi'}(\mathbf{z}'_0 | \mathbf{x})$  via  $Q_{\phi}(\cdot)$ , i.e.

$$\omega'^i \sim q_0(\omega), \quad \tilde{\mathbf{z}}_0^i = Q_{\phi}(\cdot | \mathbf{x}, \omega'^i),$$

and  $\{\mathbf{z}_1^{(i)}\}_{i=1}^S$  are samples drawn by

$$\omega^i \sim q_0(\omega), \quad \tilde{\mathbf{z}}_0^i = Q_{\phi}(\cdot | \mathbf{x}, \omega^i), \quad \mathbf{z}_1^{(i)} \sim \mathcal{T}_1(\tilde{\mathbf{z}}_0^i).$$

For simplicity, we consider  $\mathcal{T}_1$  as one discretized step for Langevin dynamics, i.e.,

$$\mathcal{T}_1(\tilde{\mathbf{z}}_0^i) = \tilde{\mathbf{z}}_0^i + \nabla_{\mathbf{z}} \log p_{\theta}(\mathbf{x}, \tilde{\mathbf{z}}_0^i) h + \sqrt{2h} \xi,$$

where  $\xi \sim \mathcal{N}(0, \mathbf{I})$ . Consequently, the objective becomes

$$\begin{aligned}
 \tilde{F} &\triangleq \frac{1}{S} \sum_{i=1}^S \left\| Q_{\phi}(\cdot | \mathbf{x}, \omega'^i) - Q_{\phi}(\cdot | \mathbf{x}, \omega^i) \right. \\
 &\quad \left. - \nabla_{\mathbf{z}} \log p_{\theta}(\mathbf{x}, \tilde{\mathbf{z}}_0^i) h + \sqrt{2h} \xi \right\|^2, \quad (16)
 \end{aligned}$$

(16) is a stochastic version of the following equivalent objective:

$$\begin{aligned}
 F &\triangleq \mathbb{E}_{\omega', \omega \sim p_0(\omega), \xi} \left\| Q_{\phi}(\cdot | \mathbf{x}, \omega'^i) - Q_{\phi}(\cdot | \mathbf{x}, \omega^i) \right. \\
 &\quad \left. - \nabla_{\mathbf{z}} \log p_{\theta}(\mathbf{x}, \tilde{\mathbf{z}}_0^i) h + \sqrt{2h} \xi \right\|^2. \quad (17)
 \end{aligned}$$

There are two cases related to  $\omega$  and  $\omega'$ . *i*) If  $\omega$  is restricted to be equal to  $\omega'$ , e.g., they share the same random seed, this is the case in amortized SVGD (Wang & Liu, 2017) or amortized MCMC (Li et al., 2017b), as well as in Proposition 4 where Euclidean distance is adopted. *ii*) If  $\Omega$  and  $\Omega'$  do not share the same random seed, this is a more general case, which we also want to show that it can not learn a good generator.

For case *i*),  $F$  is simplified as:

$$F = \mathbb{E}_{\omega \sim p_0(\omega)} \left\| \nabla_{\mathbf{z}} \log p_{\theta}(\mathbf{x}, \tilde{\mathbf{z}}_0^i) \right\|^2 h^2 + \sqrt{2h} \mathbb{E}_{\xi} \|\xi\|^2.$$

Thus the minimum value corresponds to  $\nabla_{\mathbf{z}} \log p_{\theta}(\mathbf{x}, \tilde{\mathbf{z}}_0^i) = 0$ , i.e.,  $\phi$  is updated so that  $\tilde{\mathbf{z}}_0^i$  falls in one of the local modes of  $p_{\theta}(\mathbf{z} | \mathbf{x})$ . Proposition 4 is proved.

We also want to consider case *ii*). In this case,  $F$  is bounded by

$$\begin{aligned}
 F &\leq \mathbb{E}_{\omega', \omega \sim p_0(\omega)} \left\| Q_{\phi}(\cdot | \mathbf{x}, \omega'^i) - Q_{\phi}(\cdot | \mathbf{x}, \omega^i) \right\|^2 \\
 &\quad + \mathbb{E}_{\omega \sim p_0(\omega)} \left\| \nabla_{\mathbf{z}} \log p_{\theta}(\mathbf{x}, \tilde{\mathbf{z}}_0^i) \right\|^2 h^2 + 2h \mathbb{E}_{\xi} \|\xi\|^2
 \end{aligned}$$

The minimum possible value of the upper bound of  $F$  is achieved when  $Q_{\phi}$  matches all  $\omega \sim p_0(\omega)$  to a fixed point  $\tilde{\mathbf{z}}$ , and also  $\nabla_{\mathbf{z}} \log p_{\theta}(\mathbf{x}, \tilde{\mathbf{z}}) = 0$ . This is also a special mode of  $p_{\theta}(\mathbf{z} | \mathbf{x})$  if it exists.

To sum up, by defining  $\mathcal{D}$  to be standard Euclidean distance,  $Q_{\phi}$  would generate samples from local modes of  $p_{\theta}(\mathbf{z} | \mathbf{x})$ .

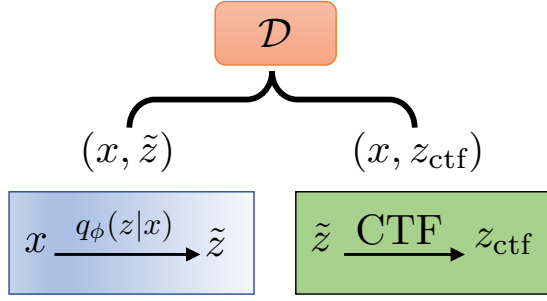

Figure 8. Implementation of  $\mathcal{D}$  defined in (8) for distribution matching with the ALICE framework (Li et al., 2017a).

■

Now we describe how to define  $\mathbb{D}$  as Wasserstein within a GAN framework. Following (Li et al., 2017a), we define a discriminator to match the joint distributions  $p(\mathbf{x}, \mathbf{z}_{\text{ctf}})$  (an implicit distribution) and  $q_\phi(\mathbf{x}, \tilde{\mathbf{z}})$ , where

$$\begin{aligned} q_\phi(\mathbf{x}, \tilde{\mathbf{z}}) &\triangleq q(\mathbf{x})q_\phi(\tilde{\mathbf{z}}|\mathbf{x}) \\ (\mathbf{x}, \mathbf{z}_{\text{ctf}}) &\sim p(\tilde{\mathbf{x}}, \mathbf{z}), \text{ with } \mathbf{z}_{\text{ctf}} = \mathcal{T}_1(\tilde{\mathbf{z}}). \end{aligned}$$

The graphical structure is defined in Figure 8.

## D. Two 2D Distributions

$$\mathbf{z} = \{\mathbf{z}_1, \mathbf{z}_2\}: p(\mathbf{z}) \propto e^{-U(\mathbf{z})}.$$

The first distribution is

$$U(\mathbf{z}) \triangleq \frac{1}{2} \left( \frac{\|\mathbf{z}\| - 2}{0.4} \right)^2 - \ln \left( e^{-\frac{1}{2} \left[ \frac{\mathbf{z}_2 - 4}{2.0} \right]^2} + e^{-\frac{1}{2} \left[ \frac{\mathbf{z}_2 + 2}{0.2} \right]^2} \right)$$

The second distribution is

$$U(\mathbf{z}) \triangleq -\ln \left( e^{-\frac{1}{2} \left[ \frac{\mathbf{z}_2 - w_1(\mathbf{z})}{0.35} \right]^2} + e^{-\frac{1}{2} \left[ \frac{\mathbf{z}_2 - w_1(\mathbf{z}) + w_2(\mathbf{z})}{0.35} \right]^2} \right)$$

where

$$w_2(\mathbf{z}) = \sin\left(\frac{2\pi \mathbf{a}_1}{4}\right), \text{ and } w_2(\mathbf{z}) = 3 \exp\left(\frac{1}{2} \left[ \frac{\mathbf{z}_1 - 1}{0.6} \right]^2\right)$$

## E. Algorithm for Density Estimation with CTFs

Algorithm 1 illustrates the details updates for MacGAN.

## F. Connection to WGAN

We derive the upper bound of the maximum likelihood estimator, which connects MacGAN to WGAN. Let  $p_r$  be the

**Algorithm 1** CTFs for generative models at the  $k$ -th iteration.  $\mathcal{D}(\cdot, \cdot)$  is the same as (8).

**Input:** parameters from last step  $\theta^{(k-1)}, \phi^{(k-1)}$

**Output:** updated parameters  $\theta^{(k)}, \phi^{(k)}$

1. Generate samples  $\{\mathbf{x}_{1,s}\}_{s=1}^S$  via a discretized CTF:  $\mathbf{x}_{0,s} \sim q_{\phi^{(k-1)}}(\mathbf{x}_0), \mathbf{x}_{1,s} \sim \mathcal{T}_1(\mathbf{x}_{0,s});$

2. Update the generator by minimizing ( $\{\mathbf{x}'_{0,s}\}_{s=1}^S$  are generated with the updated parameter  $\phi^{(k)}$ ):

$$\phi^{(k)} = \arg \min_{\phi} \mathcal{D}(\{\mathbf{x}_{1,s}\}, \{\mathbf{x}'_{0,s}\}).$$

3. Update the energy-based model  $\theta^k$  by maximum likelihood, with gradient as (9) except replacing  $\mathbb{E}_{\mathbf{x} \sim p_\theta(\mathbf{x})}$  with  $\mathbb{E}_{\mathbf{x} \sim q_\phi(\mathbf{x})}$ ;

data distribution, rewrite our maximum likelihood objective as

$$\begin{aligned} &\max \frac{1}{N} \sum_{i=1}^N \log p_\theta(\mathbf{x}_i) \\ &= \max \frac{1}{N} \sum_{i=1}^N \left( U(\mathbf{x}_i; \theta) - \log \int e^{U(\mathbf{x}; \theta)} d\mathbf{x} \right). \end{aligned}$$

The above maximum likelihood estimator can be bounded with Jensen's inequality as:

$$\max \frac{1}{N} \sum_{i=1}^N \log p_\theta(\mathbf{x}_i) \quad (18)$$

$$\begin{aligned} &\leq \max \mathbb{E}_{\mathbf{x} \sim p_r} [U(\mathbf{x}; \theta)] - \log \int \frac{e^{U(\mathbf{x}; \theta)}}{q_\phi(\mathbf{x}; \omega)} q_\phi(\mathbf{x}; \omega) d\mathbf{x} \\ &\leq \max \mathbb{E}_{\mathbf{x} \sim p_r} [U(\mathbf{x}; \theta)] - \mathbb{E}_{\mathbf{x} \sim q_\phi(\mathbf{x}; \omega)} \left[ \log \frac{e^{U(\mathbf{x}; \theta)}}{q_\phi(\mathbf{x}; \omega)} \right] \end{aligned}$$

$$\begin{aligned} &= \max \mathbb{E}_{\mathbf{x} \sim p_r} [U(\mathbf{x}; \theta)] - \mathbb{E}_{\mathbf{x} \sim q_\phi(\mathbf{x}; \omega)} [U(\mathbf{x}; \theta)] \quad (19) \\ &\quad - \mathbb{E}_{\mathbf{x} \sim q_\phi(\mathbf{x}; \omega)} [\log q_\phi(\mathbf{x}; \omega)]. \quad (20) \end{aligned}$$

This results in the same objective form as WGAN except that our model does not restrict  $U(\mathbf{x}; \theta)$  to be 1-Lipschitz functions and the objective has an extra constant term  $\mathbb{E}_{\mathbf{x} \sim q_\phi(\mathbf{x}; \omega)} [\log q_\phi(\mathbf{x}; \omega)]$  w.r.t.  $\theta$ .

Now we prove Proposition 5.

**Proof** [Proof of Proposition 5] First it is clear that the equality in (18) is achieved if and only if

$$q_\phi(\mathbf{x}; \omega) = p_\theta(\mathbf{x}) \propto e^{U(\mathbf{x}; \theta)}.$$

From the description in Section 4 and (18), we know that  $\theta$  and  $\phi$  share the same objective function, which is an upper bound of the MLE in (18).

Furthermore, based on the property of continuous-time flows (or formally Theorem 2), we know that  $q_\phi$  is learned such that  $q_\phi \rightarrow p_\theta$  in the limit of  $h \rightarrow 0$  (or alternatively, we could achieve this by using a decreasing-step-size sequence in a numerical method, as proved in (Chen et al., 2015)). When  $q_\phi = p_\theta$ , the equality in (18) is achieved, leading to the MLE. ■

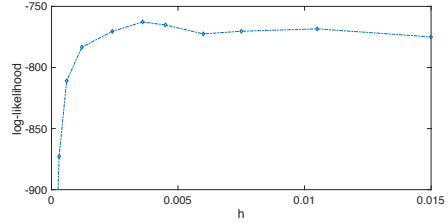

Figure 15. Log-likelihoods vs discretization stepsize for MacGAN on MNIST.

## G. Additional Experiments

### G.1. Calculating the testing ELBO for MacVAE

We follow the method in (Pu et al., 2017) for calculating the ELBO for a test data  $\mathbf{x}_*$ . First, after distilling the CTF into the inference network  $q_\phi$ , we have that the ELBO can be represented as

$$\log p(\mathbf{x}_*) \geq \mathbb{E}_{q_\phi} [\log p_\theta(\mathbf{x}_*, \mathbf{z}_*)] - \mathbb{E}_{q_\phi} [\log q_\phi] .$$

The expectation is approximated with samples  $\{\mathbf{z}_{*j}\}_{j=1}^M$  with  $\mathbf{z}_{*j} = f_\phi(\mathbf{x}_*, \zeta_j)$ , and  $\zeta_j \sim q_0(\zeta)$  the standard isotropic normal. Here  $f_\phi$  represents the deep neural network in the inference network. Note  $q_\phi(\mathbf{z}_*)$  is not readily obtained. To evaluate it, we use the density transformation formula:  $q_\phi(\mathbf{z}_*) = q_0(\zeta) \left| \det \frac{\partial f_\phi(\mathbf{x}_*, \zeta)}{\partial \zeta} \right|^{-1}$ .

### G.2. Network architecture

The architecture of the generator of MacGAN is given in Table 1.

### G.3. Additional results

Additional experimental results are given in Figure 9 – 14.

### G.4. Robustness of the discretization stepsize

To test the impact of the discretization stepsize  $h$  in (6), following SteinGAN (Feng et al., 2017), we test MacGAN on the MNIST dataset, where we use a simple Gaussian-Bernoulli Restricted Boltzmann Machines as the energy-based model. We adopt the annealed importance sampling method to evaluate log-likelihoods (Feng et al., 2017). We vary  $h$  in  $\{6e-4, 2.4e-3, 3.6e-3, 6e-3, 1e-2, 1.5e-2\}$ . The trend of log-likelihoods is plotted in Figure 15. We can see that log-likelihoods do not change a lot within the chosen stepsize interval, demonstrating the robustness of  $h$ .

Table 1. Architecture of generator in MacGAN

| Output Size               | Architecture                                                                   |
|---------------------------|--------------------------------------------------------------------------------|
| $100 \times 1$            | $100 \times 10$ Linear, BN, ReLU                                               |
| $256 \times 8 \times 8$   | $512 \times 4 \times 4$ deconv, $256 \ 5 \times 5$ kernels, ReLU, strike 2, BN |
| $128 \times 16 \times 16$ | $256 \times 8 \times 8$ deconv, $128 \ 5 \times 5$ kernels, ReLU, strike 2, BN |
| $3 \times 32 \times 32$   | $128 \times 16 \times 16$ deconv, $3 \ 5 \times 5$ kernels, Tanh, strike 2     |

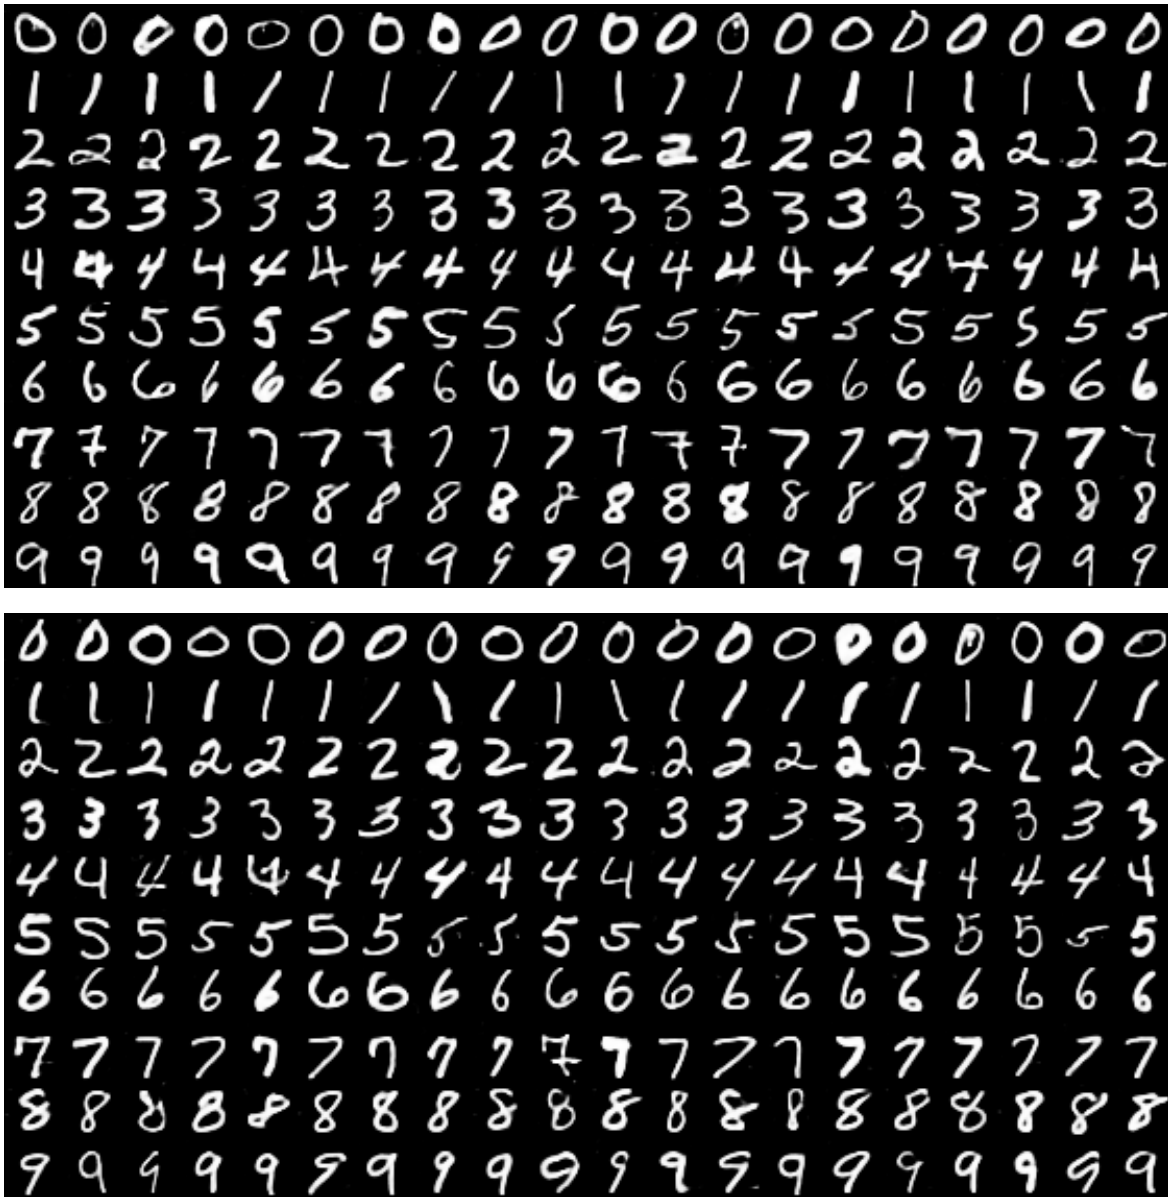

Figure 9. Generated images for MNIST datasets with MacGAN (top) and SteinGAN (bottom).

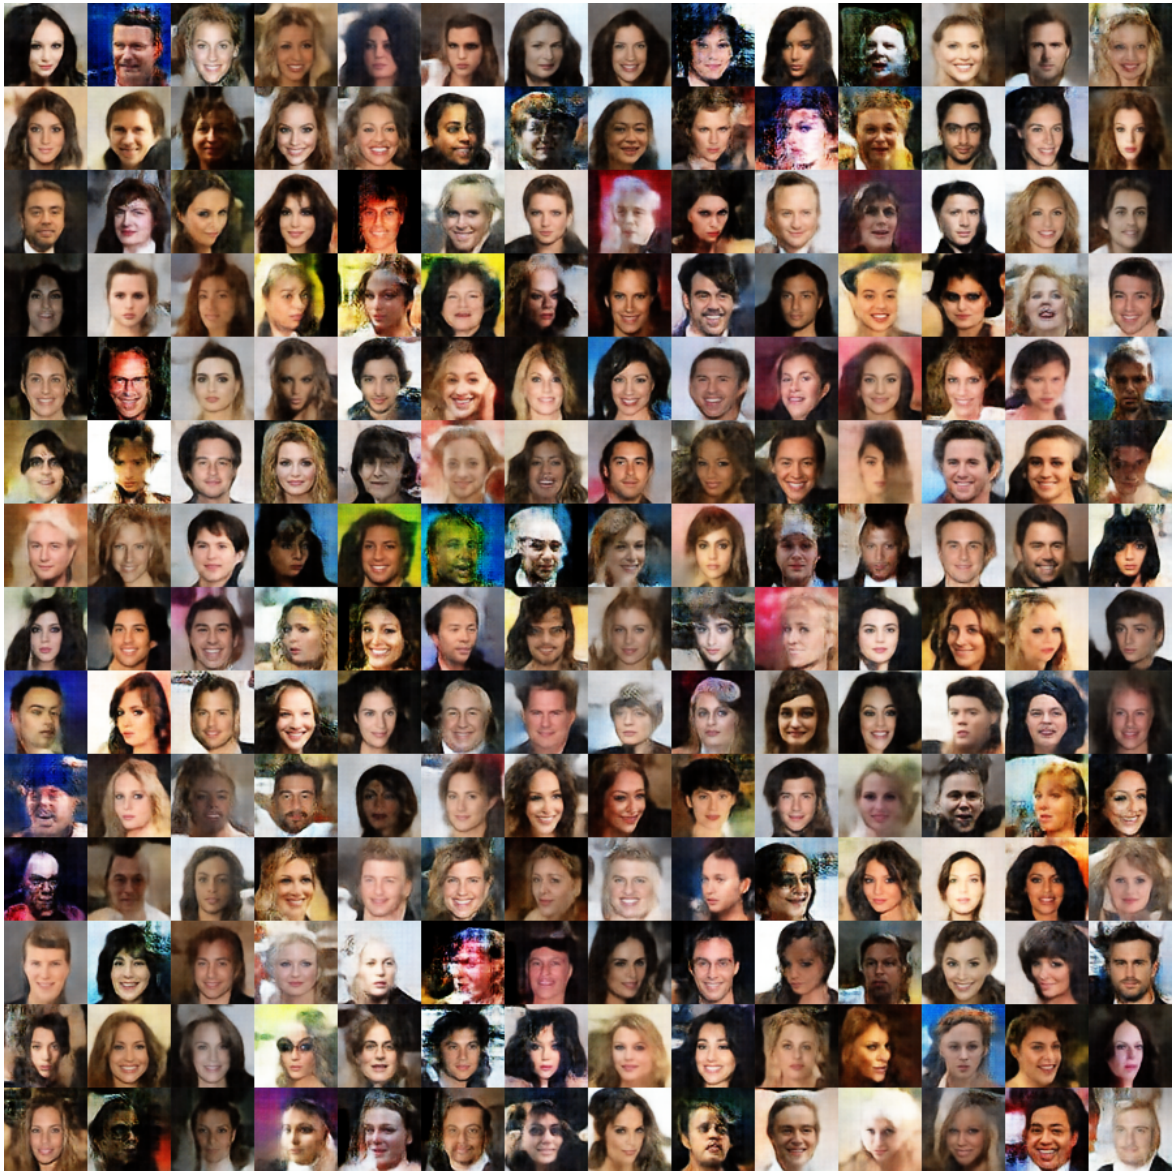

Figure 10. Generated images for CelebA datasets with MacGAN.

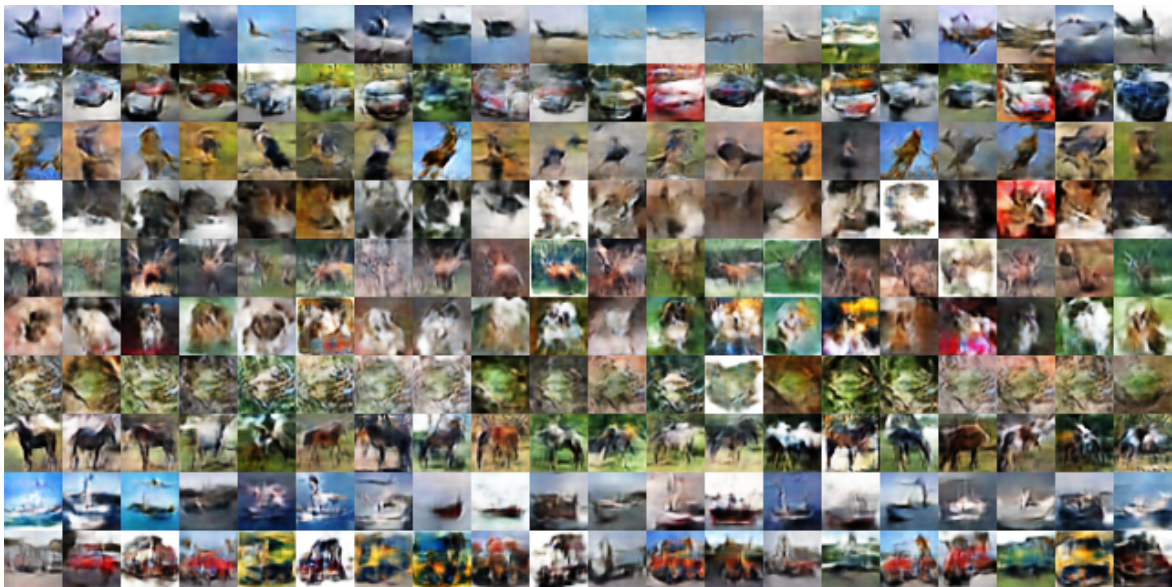

Figure 11. Generated images for CIFAR-10 datasets with MacGAN.

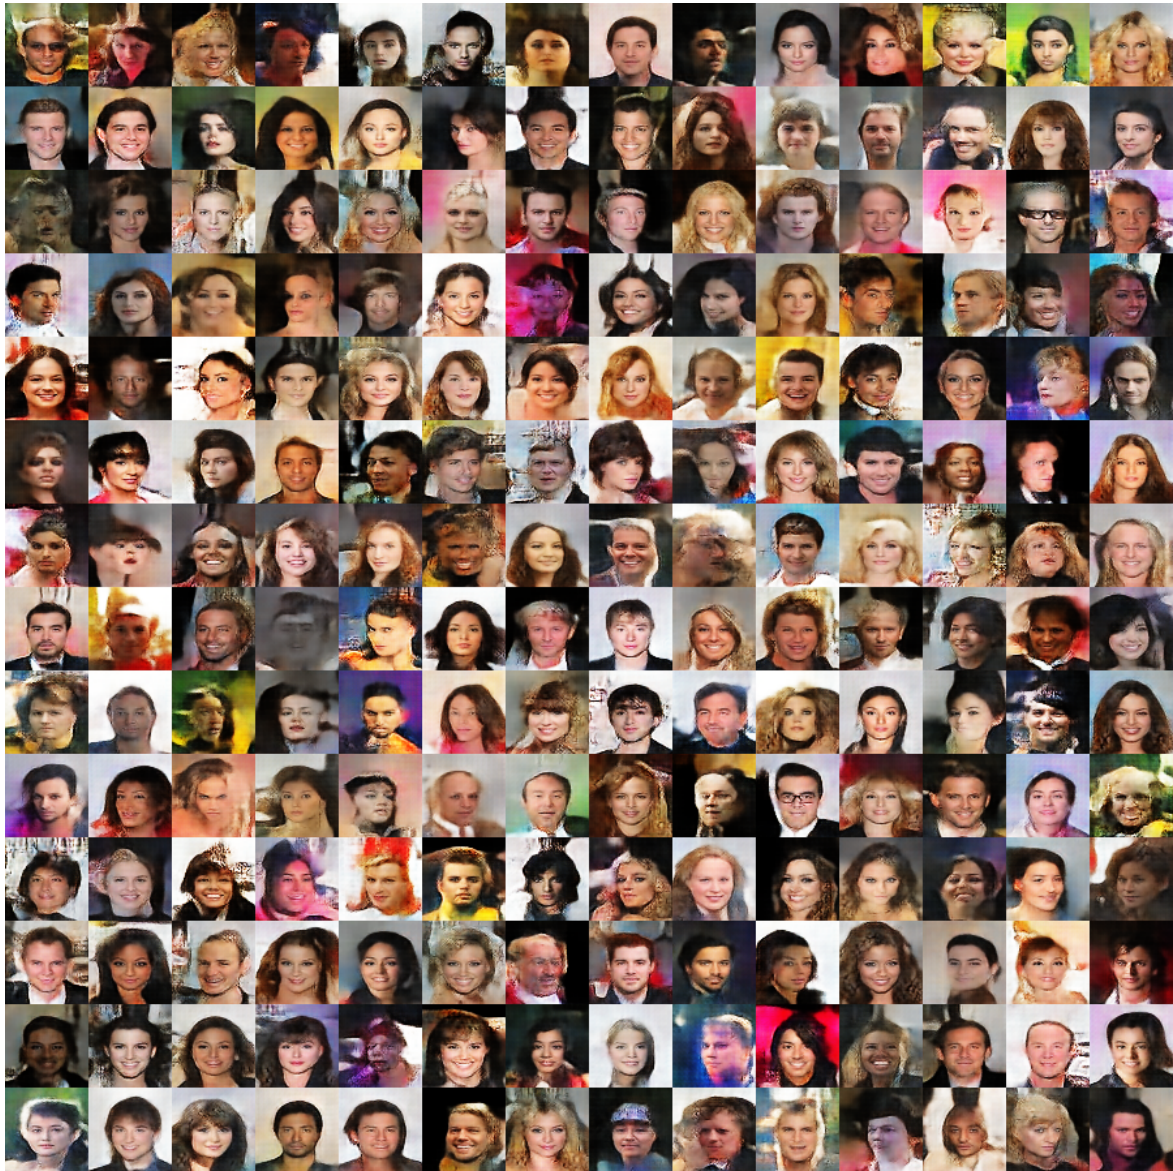

Figure 12. Generated images for CelebA datasets with SteinGAN.



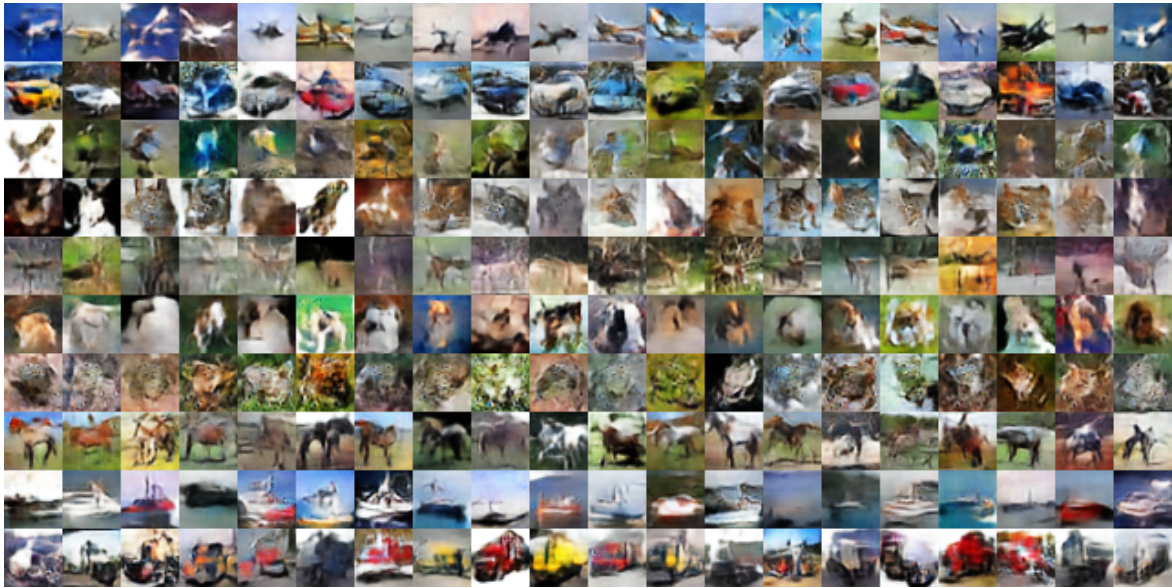

Figure 13. Generated images for CIFAR-10 datasets with SteinGAN.

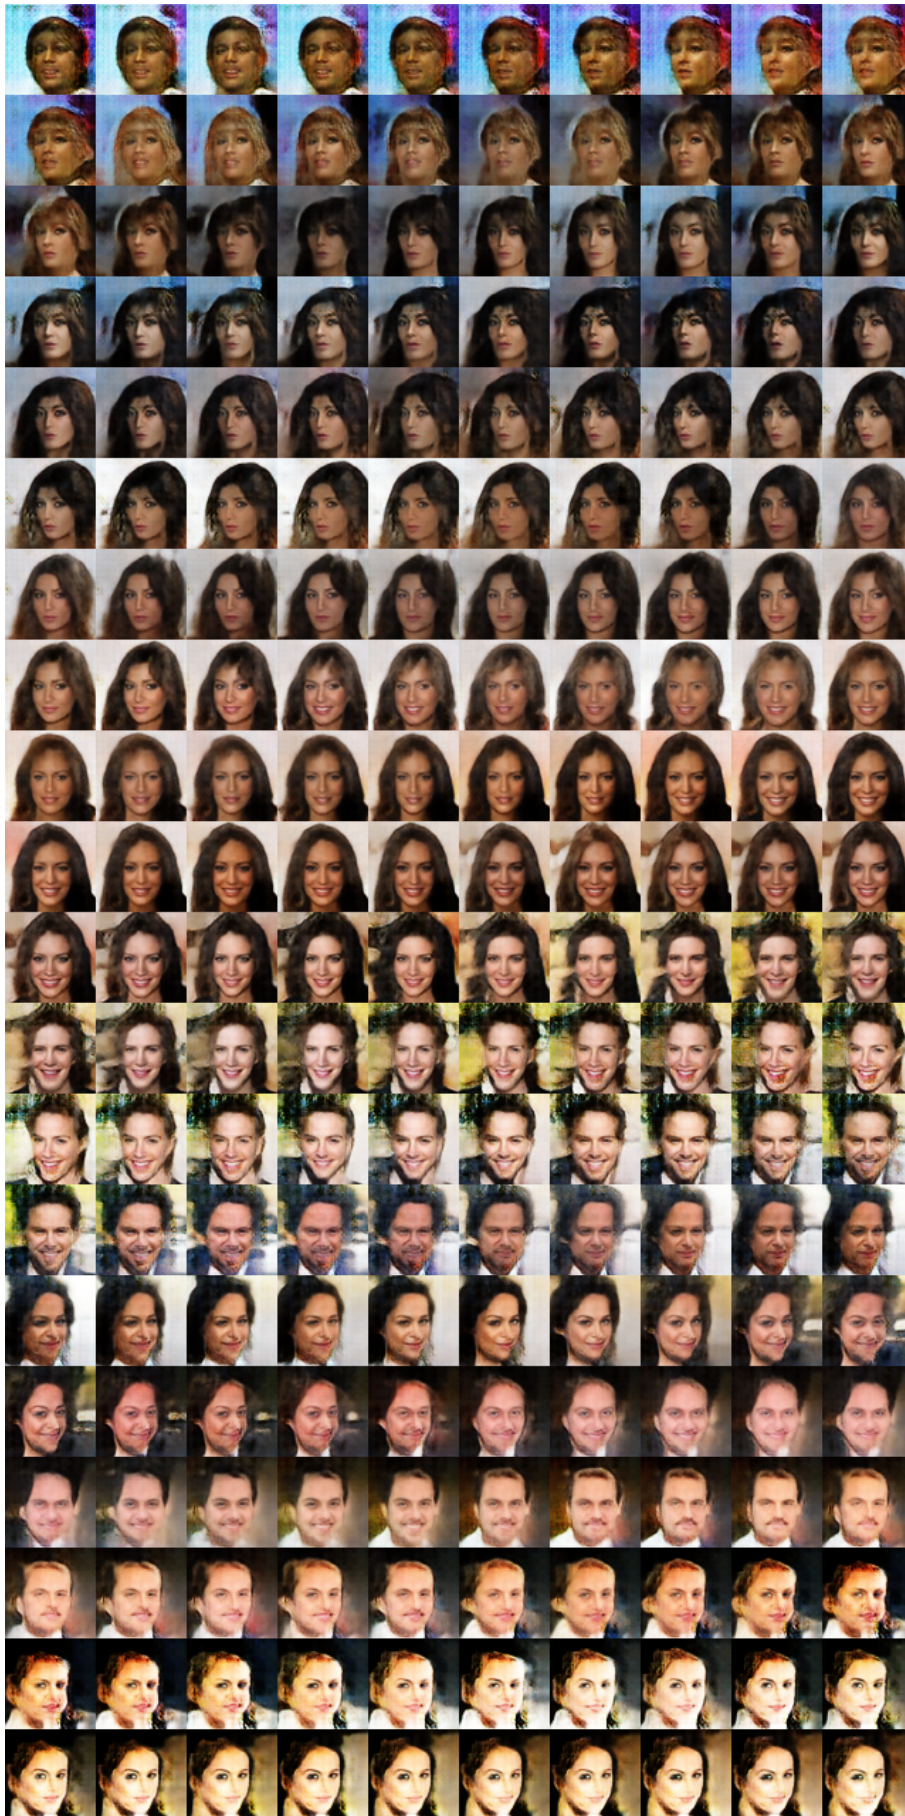

Figure 14. Generated images with a random walk on the  $\omega$  space for CelebA datasets with MacGAN,  $\omega_t = \omega_{t-1} + 0.02 \times \text{rand}([-1, 1])$ .
